# Supplementary material for: Photothermal-enhanced solar water oxidation on NiO/amorphous carbon/BiVO4 and CoOx/amorphous carbon/BiVO4 photoanodes
Source: Royal Society of Chemistry journal article supplement (doi:10.1039/d3cy01091k), 2023-01-01
Supplement: d3cy01091k1.pdf [file d3cy01091k1.pdf]

*Electronic Supplementary Information*

**Photothermal-enhanced solar water oxidation on NiO/amorphous carbon/BiVO<sub>4</sub> and CoOx/amorphous carbon/BiVO<sub>4</sub> photoanodes**

Huichao He,<sup>‡a</sup> Yuli Xiong,<sup>‡b</sup> Hao Xiao,<sup>a</sup> Tao Han,<sup>a</sup> Yujie Guo,<sup>a</sup> Jiahe Li,<sup>a</sup> Qiwen Chen,<sup>a</sup> Yunhuai Zhang,<sup>c\*</sup> Jinyan Du<sup>d\*</sup> and Gaili Ke<sup>ad\*</sup>

<sup>a</sup>*School of Metallurgy and Materials Engineering, Chongqing University of Science and Technology, Chongqing 401331, China.*

<sup>b</sup>*College of Physics and Electronic Engineering, Chongqing Normal University, Chongqing 401331, China.*

<sup>c</sup>*College of Chemistry and Chemical Engineering, Chongqing University, Chongqing 400044, China.*

<sup>d</sup>*State Key Laboratory of Environmental Friendly Energy Materials, School of Materials and Chemistry, Southwest University of Science and Technology, Mianyang 621010, China.*

<sup>‡</sup>These authors contributed equally to this work

**Corresponding Authors' Email:**

kgl.xzy@163.com (Gaili Ke)

xp2031@163.com (Yunhuai Zhang)

jinyandu990218@163.com (Jinyan Du)

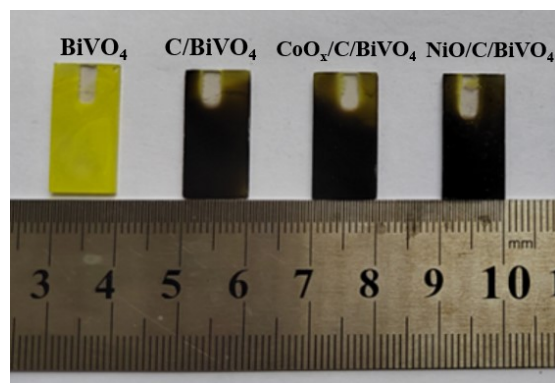

**Fig. S1** Photographs of  $\text{BiVO}_4$ ,  $\text{C/BiVO}_4$ ,  $\text{CoO}_x/\text{C/BiVO}_4$  and  $\text{NiO/C/BiVO}_4$  film.

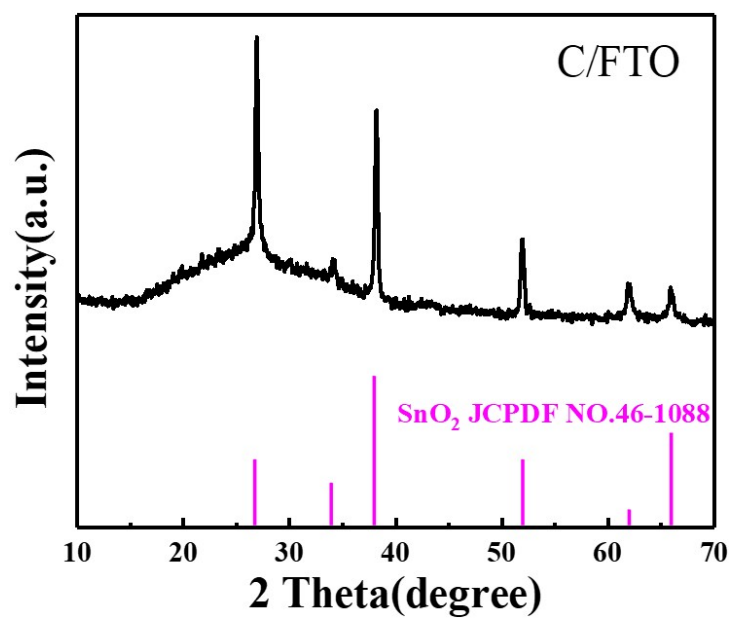

**Fig. S2** XRD pattern of C/FTO film. The C/FTO film was prepared by the similar candle flame roasting approach for the preparation of NiO/C/BiVO<sub>4</sub> and CoO<sub>x</sub>/C/BiVO<sub>4</sub> film.

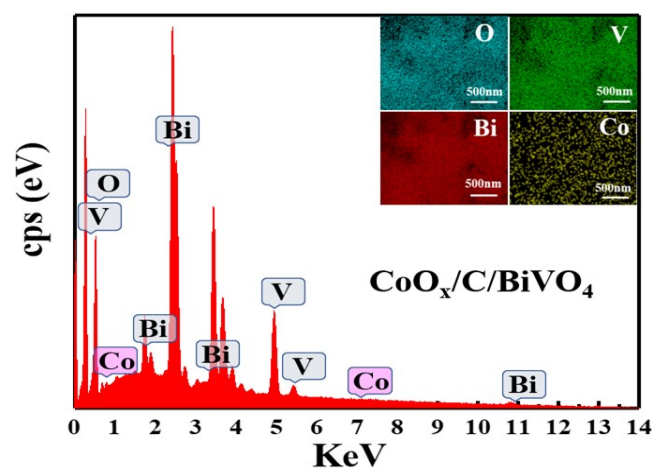

**Fig. S3** The EDS signals collected from the  $\text{CoO}_x/\text{C}/\text{BiVO}_4$  film.

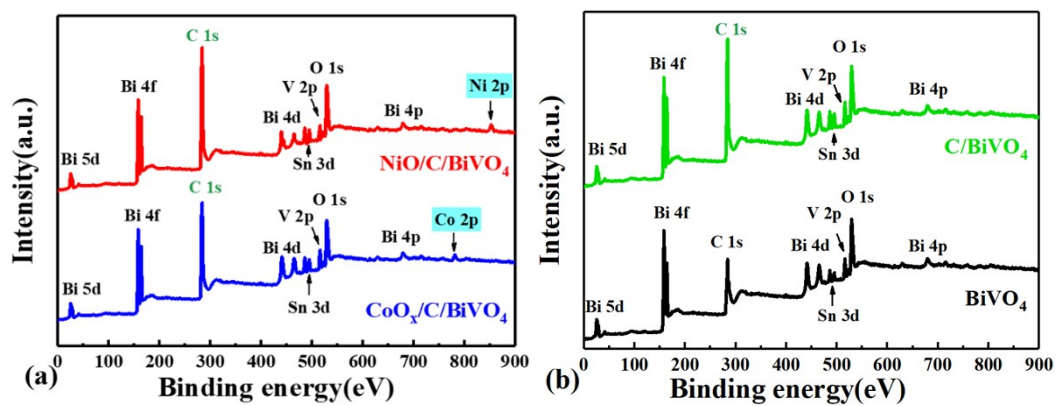

**Fig. S4** Survey XPS spectrum of (a)  $\text{CoO}_x/\text{C}/\text{BiVO}_4$  and  $\text{NiO}/\text{C}/\text{BiVO}_4$ , (b)  $\text{BiVO}_4$  and  $\text{C}/\text{BiVO}_4$  film.

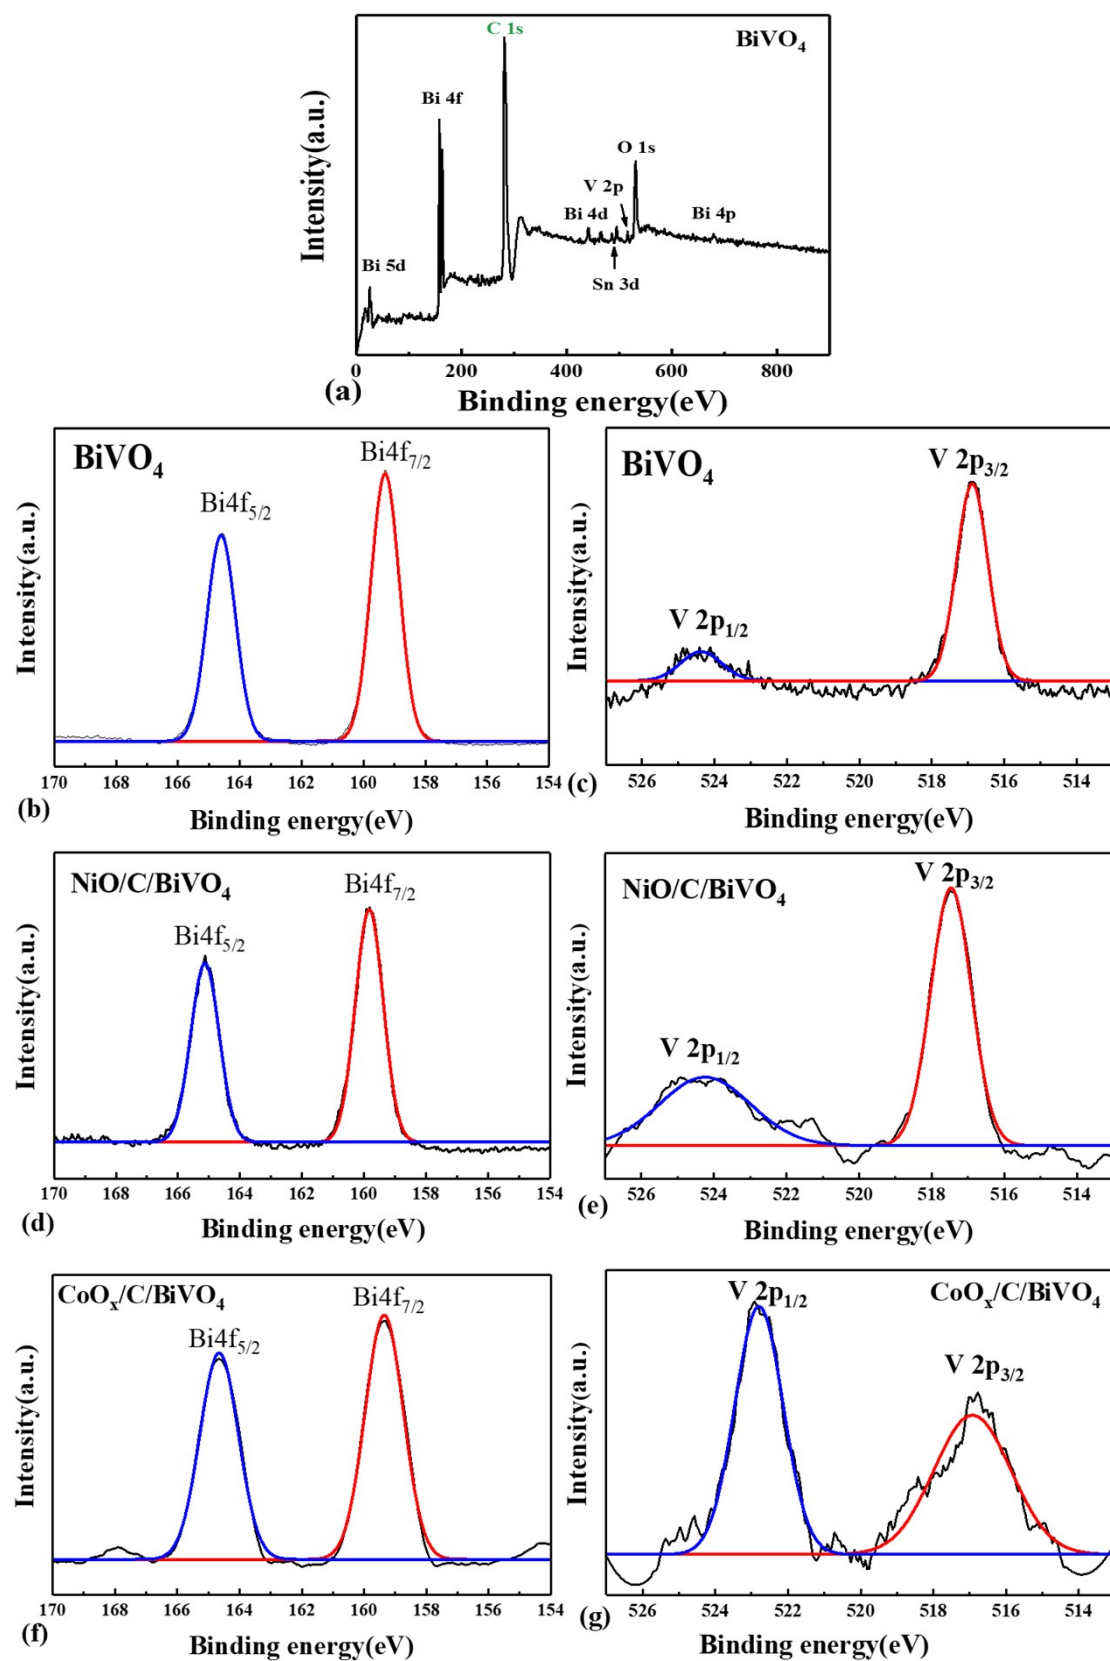

**Fig. S5** (a) Survey XPS spectrum of  $\text{BiVO}_4$  film. (b-g) High-resolution Bi 4f and V 2p XPS spectrum collected from  $\text{BiVO}_4$ ,  $\text{NiO/C/BiVO}_4$  and  $\text{CoO}_x/\text{C/BiVO}_4$  film.

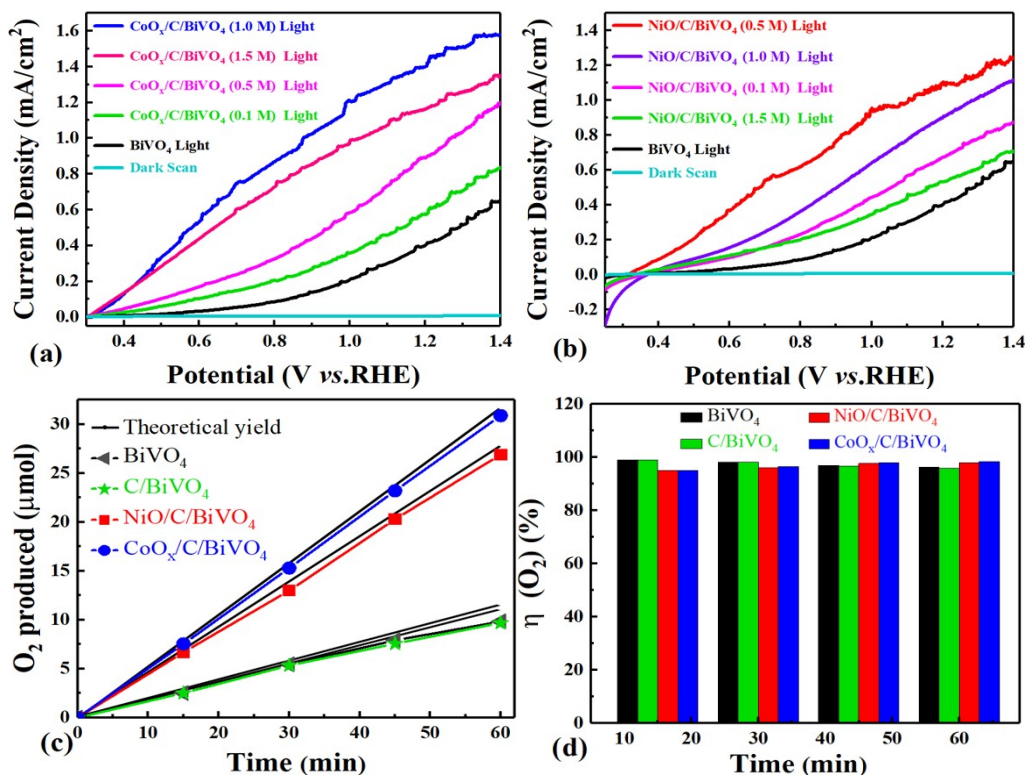

**Fig. S6** LSV curves of the BiVO<sub>4</sub>, (a) CoO<sub>x</sub>/C/BiVO<sub>4</sub> and (b) NiO/C/BiVO<sub>4</sub> film in 0.1 M NaPi buffer under and without AM 1.5G irradiation. The CoO<sub>x</sub>/C/BiVO<sub>4</sub> and NiO/C/BiVO<sub>4</sub> films were prepared using Ni<sup>2+</sup>- or Co<sup>2+</sup>-containing solution with different concentrations (0.1 M, 0.5 M, 1.0 M and 1.5 M). (c) The curves of O<sub>2</sub> generation vs. reaction time, and (b) faradic efficiency of oxygen evolution reaction for the BiVO<sub>4</sub>, C/BiVO<sub>4</sub>, CoO<sub>x</sub>/C/BiVO<sub>4</sub> and (b) NiO/C/BiVO<sub>4</sub> film in 0.1 M NaPi buffer under AM 1.5G irradiation at 1.23 V vs. RHE.

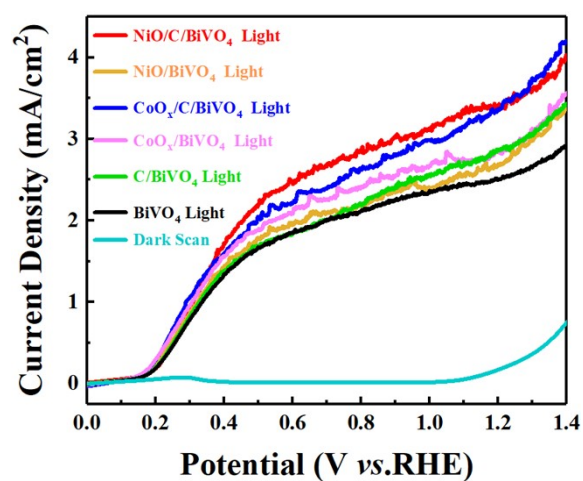

**Fig. S7** LSV curves for BiVO<sub>4</sub>, C/BiVO<sub>4</sub>, NiO/BiVO<sub>4</sub>, CoO<sub>x</sub>/BiVO<sub>4</sub>, NiO/C/BiVO<sub>4</sub> and CoO<sub>x</sub>/C/BiVO<sub>4</sub> film in 0.1 M NaPi-1.0 M Na<sub>2</sub>SO<sub>3</sub> under and without AM 1.5G irradiation, the scan rate was 15 mV/s.

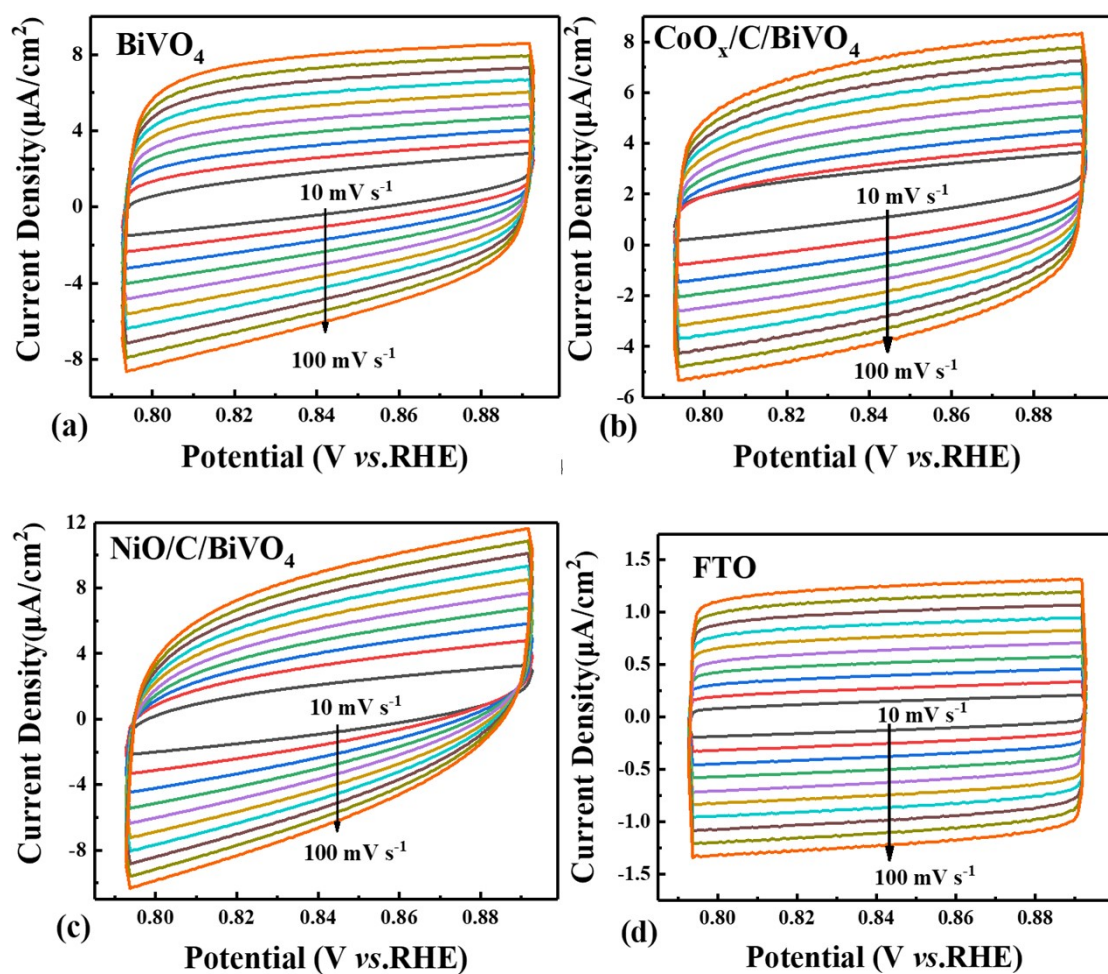

**Fig. S8** The  $\Delta I \sim \nu$  plots used for the calculation of double-layer capacitance ( $C_{dl}$ ) for (a)  $\text{BiVO}_4$ , (b)  $\text{CoO}_x/\text{C}/\text{BiVO}_4$ , (c)  $\text{NiO}/\text{C}/\text{BiVO}_4$  and (d) FTO electrode at 0.85 V vs. RHE.

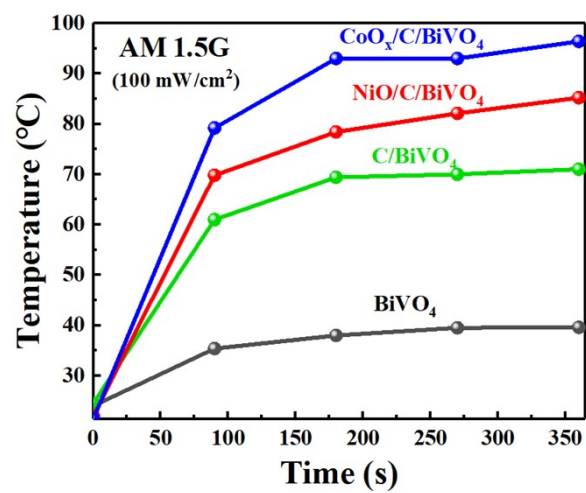

**Fig. S9** The time-temperature curves of BiVO<sub>4</sub>, C/BiVO<sub>4</sub>, CoO<sub>x</sub>/C/BiVO<sub>4</sub> and NiO/C/BiVO<sub>4</sub> film under AM 1.5G irradiation.

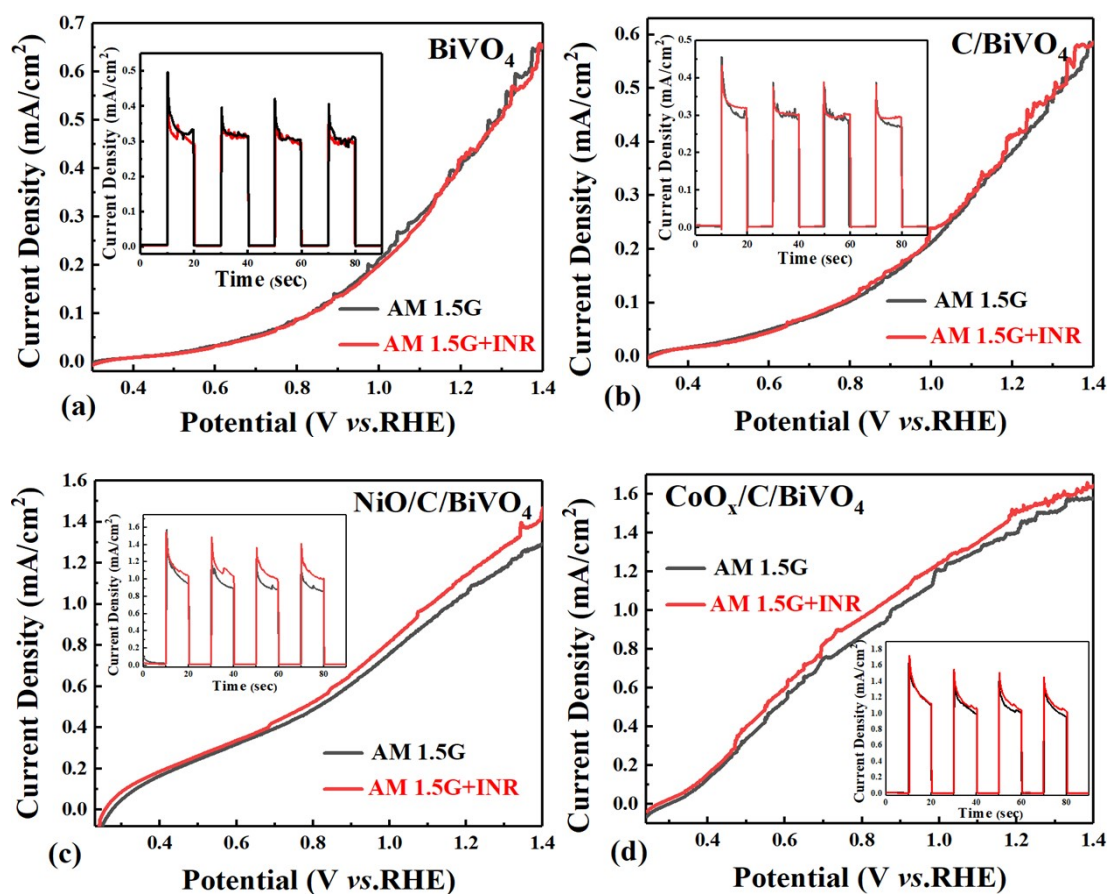

**Fig.S10** LSV scans for (a) BiVO<sub>4</sub>, (b) C/BiVO<sub>4</sub>, (c) NiO/C/BiVO<sub>4</sub> and (d) CoO<sub>x</sub>/C/BiVO<sub>4</sub> film electrodes in 0.1 M NaPi buffer under AM 1.5G/near infrared light irradiation (808 nm, 1W/cm²).

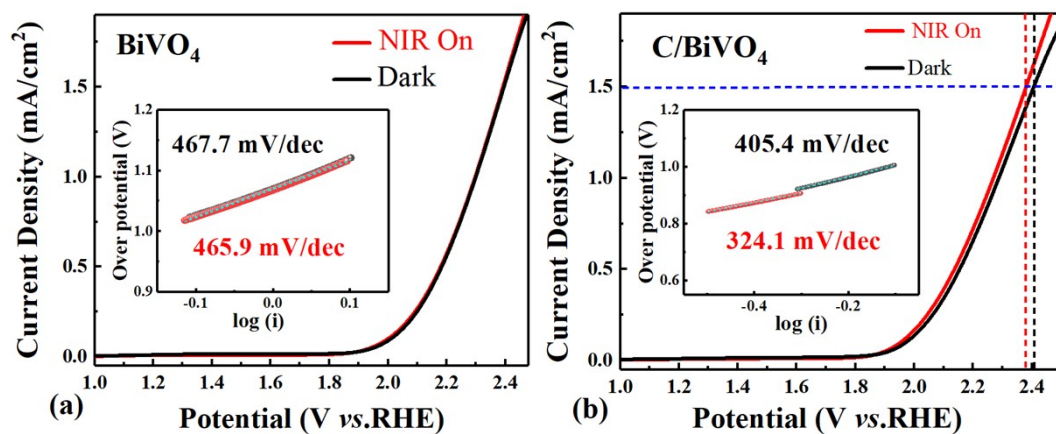

**Fig. S11** LSV and Tafel curve of (a)  $\text{BiVO}_4$  and (b)  $\text{C/BiVO}_4$  film electrodes in 0.1 M NaPi buffer in dark condition with near infrared light irradiation (808 nm,  $1 \text{ W}/\text{cm}^2$ ).
